# Supplementary material
Source: PubMed Central journal article supplement (PMC3556646)
Supplement: NIHMS434396-supplement-Suppl_Tables.pdf [file NIHMS434396-supplement-Suppl_Tables.pdf]

**Supporting Table 1**

Characteristics of patients with Crohn's disease from whom samples were obtained

| <b>Characteristic</b>                          | <b>N=19</b> |
|------------------------------------------------|-------------|
| Female n (%)                                   | 12 (63)     |
| Median age in years (IQR)                      | 32 (27-47)  |
| Median disease duration (yrs) (IQR)            | 6 (2-16)    |
| <b>Montreal Disease classification n (%)</b>   |             |
| Inflammatory (B1)                              | 9 (47)      |
| Stenotic (B2)                                  | 4 (21)      |
| Penetrating (B3)                               | 6 (31)      |
| <b>Montreal Disease location n (%)</b>         |             |
| Terminal ileum (L1)                            | 3 (17)      |
| Colon (L2)                                     | 3 (17)      |
| Ileo-Colonic (L3)                              | 12 (66)     |
| Upper GI (L4)                                  | 1 (<1)      |
| Perianal Disease n (%)                         | 4 (22)      |
| Prior surgery n (%)                            | 8 (44)      |
| Current smokers n (%)                          | 2 (11)      |
| <b>Concomitant medications<sup>†</sup> (%)</b> |             |
| Steroids n (%)                                 | 7 (37)      |
| Azathioprine within 3 months n (%)             | 4 (22)      |
| <b>Mean Baseline Activity Indices (SEM)</b>    |             |
| CDAI <sup>*</sup>                              | 153 (16)    |
| Harvey-Bradshaw Index (HBI) §                  | 8 (1)       |
| CRP mg/L                                       | 54 (6)      |

*IQR, inter-quartile range; SEM, standard error of the mean; CDAI, Crohn's Disease Activity Index; CRP, C-reactive protein*

*<sup>†</sup>at time of first infliximab infusion*

*\*CDAI score in patients with inflammatory luminal disease (perianal disease excluded, as CDAI does not reflect perianal disease activity); scores >150 indicate active disease*

*§HBI scores > 5 indicate active disease*
